# Supplementary material
Source: publisher figshare collection journal article supplement (https://gsapubs.figshare.com/ndownloader/files/23300717)
Supplement: Supplementary file 1 [file 23300717]

## Sheet: Sheet1
Analytical spot	207Pb/235U	2SE	206Pb/238U	2SE	LAM	206Pb-238U age (Ma)	±
11AM32C- 1	0.15863	0.01256	0.01166	0.0005	0.0199045	74.7	3.16
11AM32C- 2	0.04726	0.007	0.00616	0.00028	0.02	39.6	1.77
11AM32C- 3	0.13765	0.01443	0.01253	0.00057	0.0197505	80.3	3.6
11AM32C- 4	0.07758	0.0092	0.01159	0.0005	0.0271739	74.3	3.22
11AM32C- 5	0.38471	0.02952	0.01389	0.00062	0.0105014	88.9	3.96
11AM32C- 6	0.07313	0.00714	0.01176	0.00049	0.0343137	75.3	3.1
11AM32C- 7	0.12603	0.0157	0.01206	0.00056	0.0178344	77.3	3.55
11AM32C- 8	0.03475	0.01134	0.00496	0.00027	0.0119048	31.9	1.76
11AM32C- 9	1.72242	0.09815	0.16539	0.00647	0.0329598	986.6	35.81
11AM32C- 11	0.05213	0.01942	0.006	0.00038	0.00978373	38.6	2.44
11AM32C- 12	0.06164	0.0076	0.01174	0.00049	0.0322368	75.2	3.1
11AM32C- 13	0.04358	0.00486	0.00542	0.00023	0.0236626	34.8	1.49
11AM32C- 14	0.0791	0.01589	0.01124	0.00056	0.0176211	72.1	3.56
11AM32C- 15	0.09625	0.01138	0.00635	0.00031	0.0136204	40.8	2.01
11AM32C- 16	0.16653	0.01099	0.02488	0.00099	0.0450409	158.4	6.24
11AM32C- 17	0.12512	0.01082	0.01198	0.00051	0.0235675	76.8	3.22
11AM32C- 18	0.07617	0.00587	0.01175	0.00047	0.0400341	75.3	3.02
11AM32C- 19	0.02609	0.00358	0.0051	0.00022	0.0307263	32.8	1.41
11AM32C- 20	0.08431	0.00579	0.01226	0.00049	0.0423143	78.5	3.12
11AM32C- 21	4.52642	0.26533	0.26462	0.01034	0.0194852	1513.5	52.69
11AM32C- 22	0.67093	0.03695	0.08562	0.00335	0.0453315	529.6	19.92
11AM32C- 23	0.08735	0.01317	0.01256	0.00056	0.0212604	80.5	3.58
11AM32C- 24	0.04587	0.00527	0.00624	0.00027	0.0256167	40.1	1.7
11AM32C- 25	0.04398	0.0039	0.00532	0.00022	0.0282051	34.2	1.43
11AM32C- 26	0.04237	0.00406	0.00564	0.00024	0.0295567	36.3	1.53
11AM32C- 27	0.03632	0.00363	0.00574	0.00024	0.0330579	36.9	1.54
11AM32C- 28	0.08891	0.01074	0.01112	0.00048	0.0223464	71.3	3.07
11AM32C- 29	0.06416	0.00824	0.01135	0.00049	0.029733	72.8	3.14
11AM32C- 30	0.03977	0.00641	0.00545	0.00016	0.0124805	35	1.01
11AM32C- 31	0.0666	0.00771	0.01035	0.00024	0.0155642	66.4	1.53
11AM32C- 32	10.6896	0.61284	0.43528	0.00606	0.00494419	2329.5	27.23
11AM32C- 33	0.07687	0.01728	0.01188	0.00035	0.0101273	76.1	2.26
11AM32C- 34	0.08043	0.00796	0.01272	0.00026	0.0163317	81.5	1.67
11AM32C- 35	0.0763	0.01497	0.01131	0.00032	0.010688	72.5	2.05
11AM32C- 36	0.07269	0.01009	0.01216	0.00029	0.0143707	77.9	1.84
11AM32C- 37	0.4518	0.03562	0.01438	0.00043	0.00603593	92	2.76
11AM32C- 38	0.04896	0.01388	0.00767	0.00029	0.0104467	49.3	1.89
11AM32C- 39	0.0746	0.00362	0.01119	0.00017	0.0234807	71.8	1.08
11AM32C- 40	0.0635	0.00781	0.0091	0.00022	0.0140845	58.4	1.41
11AM32C- 41	0.04758	0.00572	0.00665	0.00016	0.013986	42.7	1.02
11AM32C- 42	0.07604	0.01058	0.01186	0.00029	0.0137051	76	1.85
11AM32C- 43	0.08128	0.00574	0.01153	0.00021	0.0182927	73.9	1.32
11AM32C- 44	0.03767	0.00505	0.00522	0.00015	0.0148515	33.5	0.95
11AM32C- 45	0.11005	0.01862	0.01105	0.0004	0.0107411	70.9	2.57
11AM32C- 46	0.09097	0.01111	0.01133	0.00028	0.0126013	72.6	1.81
11AM32C- 47	0.07036	0.00616	0.01029	0.00019	0.0154221	66	1.24
11AM32C- 48	5.02332	0.35834	0.3358	0.00514	0.00717196	1866.4	24.8
11AM32C- 49	1.832	0.08403	0.17686	0.00246	0.0146376	1049.8	13.49
11AM32C- 50	0.11296	0.01401	0.01268	0.00035	0.0124911	81.2	2.2
11AM32C- 51	0.08007	0.00853	0.01153	0.00026	0.0152403	73.9	1.64
11AM32C- 52	0.07411	0.01366	0.01121	0.00037	0.0135432	71.8	2.35
11AM32C- 53	0.03415	0.00303	0.0052	0.00011	0.0181518	33.4	0.71
11AM32C- 54	0.04677	0.00774	0.00613	0.00019	0.0122739	39.4	1.2
11AM32C- 55	0.06273	0.00774	0.0055	0.00016	0.0103359	35.4	1
11AM32M- 1	0.164	0.01481	0.01235	0.0003	0.0101283	79.1	1.9
11AM32M- 2	0.34965	0.02055	0.03469	0.00055	0.013382	219.8	3.45
11AM32M- 3	0.06105	0.00628	0.00661	0.00016	0.0127389	42.5	1.02
11AM32M- 4	0.04061	0.0161	0.00563	0.00028	0.00869565	36.2	1.81
11AM32M- 5	0.04201	0.00433	0.0058	0.00012	0.0138568	37.3	0.76
11AM32M- 6	0.04872	0.00502	0.00588	0.00014	0.0139442	37.8	0.88
11AM32M- 7	0.04291	0.00266	0.0059	0.0001	0.018797	37.9	0.61
11AM32M- 8	0.07321	0.007	0.00655	0.00016	0.0114286	42.1	0.99
11AM32M- 9	0.06268	0.00584	0.00894	0.00018	0.015411	57.3	1.15
11AM32M- 10	0.08671	0.009	0.0051	0.00016	0.00888889	32.8	1.01
11AM32M- 11	0.02999	0.00579	0.00571	0.00016	0.0138169	36.7	1.04
11AM32M- 12	0.03564	0.002	0.00516	8e-05	0.02	33.2	0.49
11AM32M- 13	0.05108	0.00513	0.00628	0.00014	0.0136452	40.3	0.89
11AM32M- 14	0.12226	0.01023	0.00629	0.00017	0.0083089	40.4	1.08
11AM32M- 15	0.03139	0.00337	0.00517	0.00011	0.0163205	33.2	0.68
11AM32M- 16	0.07741	0.00542	0.00535	0.00011	0.0101476	34.4	0.72
11AM32M- 17	0.03681	0.00351	0.00609	0.00012	0.017094	39.1	0.75
11AM32M- 18	0.06484	0.00336	0.01073	0.00015	0.0223214	68.8	0.96
11AM32M- 19	0.79212	0.03365	0.0901	0.00114	0.0169391	556.1	6.77
11AM32M- 20	0.70488	0.03111	0.08834	0.00113	0.0181614	545.7	6.7
11AM32M- 21	0.86458	0.02751	0.10355	0.00121	0.021992	635.2	7.06
11AM32M- 22	0.04536	0.00488	0.00617	0.00015	0.0153689	39.6	0.94
11AM32M- 23	0.67566	0.0261	0.08511	0.00105	0.0201149	526.6	6.24
11AM32M- 24	0.0429	0.00578	0.00682	0.00016	0.0138408	43.8	1.05
11AM32M- 25	0.03541	0.00519	0.00521	0.00013	0.0125241	33.5	0.85
11AM32M- 26	0.04333	0.00539	0.00597	0.00015	0.0139147	38.4	0.95
11AM32M- 27	0.07152	0.00691	0.0059	0.00016	0.0115774	37.9	1
11AM32M- 28	1.47869	0.14997	0.15511	0.00299	0.00996866	929.6	16.66
11AM32M- 29	0.1011	0.00826	0.0057	0.00014	0.00847458	36.7	0.93
11AM32M- 30	0.03208	0.00378	0.00465	0.00012	0.015873	29.9	0.74
11AM32M- 31	0.07339	0.01206	0.00635	0.00023	0.00953566	40.8	1.49
11AM32M- 32	0.06809	0.01008	0.01158	0.00029	0.0143849	74.2	1.87
11AM32M- 33	0.1392	0.01	0.01328	0.00025	0.0125	85.1	1.59
11AM32M- 34	0.04092	0.00289	0.00535	9e-05	0.0155709	34.4	0.6
11AM32M- 35	0.0401	0.00455	0.00581	0.00013	0.0142857	37.3	0.84
11AM32M- 36	0.06719	0.00663	0.00666	0.00016	0.0120664	42.8	1.05
11AM32M- 37	0.03914	0.01045	0.00607	0.00021	0.0100478	39	1.37
11AM32M- 38	0.06787	0.01955	0.01041	0.00044	0.0112532	66.8	2.84
11AM32M- 39	0.39886	0.02479	0.00904	0.00022	0.00443727	58	1.42
11AM32M- 40	0.10158	0.00868	0.01226	0.00024	0.0138249	78.6	1.54
11AM32M- 41	0.50607	0.03551	0.06974	0.00112	0.0157702	434.6	6.76
11AM32M- 42	0.07534	0.0035	0.01167	0.00016	0.0228571	74.8	1.04
11AM32M- 43	0.07563	0.01144	0.01142	0.00033	0.0144231	73.2	2.1
11AM32M- 44	1.54779	0.05656	0.15609	0.00191	0.0168847	935	10.67
11AM32M- 45	3.29338	0.12068	0.25619	0.0031	0.0128439	1470.3	15.91
11AM32M- 46	0.04334	0.00355	0.00592	0.00012	0.0169014	38	0.75
11AM32M- 47	0.0471	0.00423	0.00595	0.00013	0.0153664	38.3	0.8
11AM32M- 48	4.56088	0.31557	0.31113	0.00456	0.00722502	1746.3	22.4
11AM32M- 49	0.09111	0.01025	0.01124	0.00027	0.0131707	72.1	1.71
11AM32M- 50	0.03582	0.00389	0.00544	0.00012	0.0154242	35	0.75
11AM32M- 51	0.08079	0.00983	0.0113	0.00029	0.0147508	72.5	1.86
11AM32M- 52	0.28589	0.01288	0.03564	0.00049	0.0190217	225.7	3.05
11AM32M- 53	0.03357	0.00423	0.00529	0.00013	0.0153664	34	0.84
11AM32M- 54	0.07714	0.00767	0.01235	0.00027	0.017601	79.1	1.72
11AM32M- 55	0.07865	0.02417	0.00607	0.00039	0.00806785	39	2.5
11AM32M- 56	0.1056	0.01863	0.00631	0.00027	0.00724638	40.6	1.72
11AM32M- 57	0.1061	0.0049	0.0118	0.00017	0.0173469	75.6	1.08
11AM32M- 58	0.06015	0.00479	0.00906	0.00016	0.0167015	58.2	1.04
11AM32M- 59	0.1203	0.01037	0.00638	0.00018	0.00867888	41	1.17
11AM32M- 60	0.09607	0.00789	0.01269	0.00025	0.0158428	81.3	1.58
11AM32M- 61	0.05399	0.00544	0.00916	0.00019	0.0174632	58.8	1.2
11AM32M- 62	0.03769	0.00483	0.00535	0.00015	0.015528	34.4	0.94
11AM32M- 63	0.08906	0.00733	0.01321	0.00024	0.0163711	84.6	1.55
11AM32M- 64	0.04233	0.00503	0.00599	0.00015	0.0149105	38.5	0.98
11AM32M- 65	0.64287	0.03979	0.01053	0.00031	0.00389545	67.5	1.97
11AM32M- 66	0.03693	0.0059	0.00536	0.00015	0.0127119	34.4	0.95
11AM32M- 67	0.0637	0.01171	0.01114	0.00029	0.0123826	71.4	1.83
11AM32M- 68	0.06674	0.00844	0.00742	0.00022	0.0130332	47.6	1.4
11AM32M- 69	2.37468	0.18931	0.12349	0.00224	0.00591622	750.6	12.86
11AM32M- 70	0.08715	0.01328	0.00994	0.00031	0.0116717	63.8	2.01
11AM32M- 71	0.0502	0.00875	0.00641	0.0002	0.0114286	41.2	1.26
11AM32M- 72	0.08112	0.01012	0.01204	0.0003	0.0148221	77.2	1.89
11AM32M- 73	0.10134	0.02066	0.00604	0.00031	0.00750242	38.8	1.96
11AM32M- 74	0.07503	0.01065	0.0117	0.0003	0.0140845	75	1.93
11AM32M- 75	0.04064	0.00816	0.00569	0.0002	0.0122549	36.5	1.25
11AM32M- 76	0.03081	0.00318	0.005	0.00011	0.0172956	32.2	0.7
11AM32M- 77	0.02962	0.0105	0.00516	0.00021	0.01	33.2	1.36
11AM32M- 78	0.08408	0.01549	0.00497	0.00025	0.00806972	32	1.63
11AM32M- 79	0.06553	0.00497	0.00571	0.00012	0.0120724	36.7	0.77
11AM32M- 80	5.15695	0.22378	0.31204	0.004	0.00893735	1750.7	19.64
11AM32M- 81	0.0707	0.0075	0.00953	0.00022	0.0146667	61.2	1.43
11AM32M- 82	0.08057	0.00511	0.01195	0.00019	0.018591	76.6	1.23
11AM32M- 83	0.04897	0.00813	0.00562	0.0002	0.0123001	36.1	1.27
11AM32M- 84	0.06382	0.00935	0.00521	0.0002	0.0106952	33.5	1.26
11AM32M- 85	0.07153	0.00915	0.01117	0.00028	0.0153005	71.6	1.76
11AM32M- 86	0.02761	0.00284	0.00477	0.0001	0.0176056	30.6	0.64
11AM32M- 87	0.14139	0.01157	0.00573	0.00017	0.00734659	36.9	1.08
11AM32M- 88	0.03838	0.00446	0.00483	0.00013	0.014574	31.1	0.81
11AM32M- 89	0.04768	0.00905	0.00581	0.00022	0.0121547	37.4	1.38
11AM32M- 90	0.73712	0.02192	0.08755	0.00114	0.0260036	541	6.74
11AM32M- 91	0.13419	0.01326	0.00674	0.00022	0.00829563	43.3	1.41
11AM32M- 92	0.05477	0.0056	0.00655	0.00015	0.0133929	42.1	0.96
11AM32M- 93	0.13186	0.00658	0.00917	0.00017	0.0129179	58.8	1.06
11AM32M- 94	0.06147	0.00837	0.01065	0.00026	0.0155317	68.3	1.65
11AM32M- 95	0.05589	0.00403	0.00531	0.00011	0.0136476	34.1	0.72
11AM32M- 96	0.85541	0.03754	0.10007	0.00142	0.0189132	614.8	8.31
11AM32M- 97	0.06184	0.00504	0.00636	0.00013	0.0128968	40.9	0.86
11AM32M- 98	1.14348	0.05759	0.1279	0.00188	0.0163223	775.9	10.72
11AM32M- 99	0.03513	0.01389	0.00591	0.00026	0.00935925	38	1.66
11AM32M- 100	0.03394	0.00253	0.00499	9e-05	0.0177866	32.1	0.58
11AM32M- 101	0.01747	0.01302	0.00568	0.00029	0.0111367	36.5	1.83
11AM32M- 102	0.05103	0.0073	0.00656	0.00018	0.0123288	42.1	1.18
11AM32M- 103	0.04946	0.00447	0.00514	0.00012	0.0134228	33.1	0.8
11AM32M- 104	1.23542	0.10008	0.13894	0.00256	0.0127898	838.7	14.48
11AM32M- 105	0.08968	0.00714	0.0094	0.00021	0.0147059	60.3	1.31
11AM32M- 106	0.05564	0.00704	0.00598	0.00018	0.0127841	38.4	1.15
11AM32M- 107	0.78768	0.03137	0.09452	0.00131	0.0208798	582.2	7.69
11AM32M- 108	0.08195	0.01565	0.01217	0.00038	0.0121406	78	2.41
11AM32M- 109	0.0351	0.00439	0.00615	0.00014	0.0159453	39.5	0.9
11AM32M- 110	0.03765	0.00486	0.00534	0.00014	0.0144033	34.3	0.87
11AM32M- 111	0.13696	0.00965	0.00771	0.00018	0.00932642	49.5	1.15
11AM32M- 112	0.08191	0.01167	0.01271	0.00035	0.0149957	81.4	2.21
11AM32M- 113	0.07481	0.00498	0.01206	0.0002	0.0200803	77.3	1.3
11AM32M- 114	4.17014	0.24783	0.30353	0.0045	0.0090788	1708.8	22.26
11AM32M- 115	0.03804	0.00418	0.00624	0.00014	0.0167464	40.1	0.87
11AM32M- 116	0.08442	0.01067	0.01248	0.00031	0.0145267	79.9	1.97
11AM32M- 117	0.69647	0.02481	0.08777	0.00118	0.0237807	542.3	7
11AM32M- 118	0.94443	0.02991	0.08639	0.00114	0.0190572	534.2	6.79
11AM32M- 119	0.04848	0.01883	0.00714	0.00038	0.0100903	45.9	2.46
11AM32M- 120	0.03449	0.00457	0.00529	0.00013	0.0142232	34	0.84
11AM32M- 121	0.03203	0.01394	0.00514	0.00025	0.008967	33.1	1.61
11AM32M- 122	0.05662	0.0061	0.00902	0.00021	0.0172131	57.9	1.31
11AM32M- 123	0.08456	0.00545	0.00643	0.00013	0.0119266	41.3	0.85
11AM32M- 124	0.03484	0.00331	0.00484	0.0001	0.0151057	31.1	0.66
11AM32M- 125	0.03661	0.00774	0.0051	0.00018	0.0116279	32.8	1.17
11AM32M- 126	0.05833	0.00459	0.00919	0.00017	0.0185185	59	1.07
11AM32M- 127	0.05768	0.00309	0.00579	0.0001	0.0161812	37.2	0.63
11AM32M- 128	0.03686	0.00437	0.00493	0.00012	0.01373	31.7	0.79
11AM32M- 129	0.08821	0.00817	0.00642	0.00018	0.0110159	41.3	1.12
11AM32M- 130	0.06126	0.00918	0.00533	0.00018	0.00980392	34.3	1.15
11AM32M- 131	0.5656	0.03521	0.05178	0.00091	0.0129225	325.5	5.57
11AM32M- 132	0.03177	0.00996	0.00632	0.00025	0.0125502	40.6	1.63
11AM32M- 133	0.87915	0.04218	0.07952	0.0012	0.0142248	493.2	7.18
11AM32M- 134	0.08082	0.00649	0.01077	0.00022	0.0169492	69	1.39
11AM32M- 135	0.04705	0.00513	0.00553	0.00013	0.0126706	35.6	0.87
11AM32M- 136	0.04422	0.00592	0.00495	0.00014	0.0118243	31.8	0.9
11AM32M- 137	0.03588	0.00367	0.00431	0.00013	0.0177112	27.7	0.82
11AM32M- 138	0.05342	0.00483	0.00675	0.00014	0.0144928	43.4	0.92
11AM32M- 139	0.05821	0.00494	0.00922	0.00018	0.0182186	59.2	1.15
11AM32M- 140	0.75737	0.03419	0.09241	0.00136	0.0198889	569.8	8.04
11AM32M- 141	0.03405	0.02176	0.00741	0.00043	0.00988051	47.6	2.74
11AM32M- 142	0.83256	0.03009	0.10007	0.00139	0.0230974	614.8	8.14
11AM32M- 143	1.21851	0.04881	0.12478	0.00177	0.0181315	758	10.16
11AM32M- 144	0.19247	0.0148	0.00651	0.0002	0.00675676	41.8	1.3
11AM32M- 145	0.08174	0.00666	0.01185	0.00023	0.0172673	76	1.47
11AM32M- 146	1.43214	0.09604	0.13566	0.0023	0.0119742	820.1	13.03
11AM32M- 147	0.06579	0.00985	0.00561	0.0002	0.0101523	36.1	1.29
11AM32M- 148	0.73881	0.03285	0.09145	0.00134	0.0203957	564.1	7.91
11AM32M- 149	0.07836	0.01138	0.01179	0.00031	0.0136204	75.5	1.97
11AM32M- 150	0.06665	0.00698	0.01009	0.00022	0.0157593	64.7	1.41
11AM32M- 151	0.14173	0.01174	0.01279	0.00029	0.0123509	81.9	1.85
11AM32M- 152	13.3302	0.88486	0.4864	0.00746	0.00421536	2555.1	32.36
11AM32M- 153	0.78334	0.03521	0.09594	0.00141	0.0200227	590.6	8.28
11AM32M- 154	0.7868	0.03857	0.09286	0.0014	0.0181488	572.4	8.27
